# Supplementary material for: Cardiovascular Events After Chimeric Antigen Receptor T-Cell Therapy for Advanced Hematologic Malignant Neoplasms: A Meta-Analysis
Source: PubMed Central journal article supplement (PMC11459246; doi:10.1001/jamanetworkopen.2024.37222), 2024-10-07
Supplement: jamanetwopen-e2437222-s002.pdf [file jamanetwopen-e2437222-s002.pdf]

## Data Sharing Statement

Koeckerling. Cardiovascular Events After Chimeric Antigen Receptor T-Cell Therapy for Advanced Hematologic Malignant Neoplasms. *JAMA Netw Open*. Published October 07, 2024. doi:10.1001/jamanetworkopen.2024.37222

### Data

**Data available:** No

### Additional Information

**Explanation for why data not available:** meta-analysis of published data (by us and other groups)
